# Supplementary material for: Metal‐Free Perovskite Piezoelectric Nanogenerators for Human–Machine Interfaces and Self‐Powered Electrical Stimulation Applications
Source: PubMed Central journal article supplement (PMC9218782; doi:10.1002/advs.202105974), 2022-04-20
Supplement: ADVS-9-2105974-s002.pdf [file ADVS-9-2105974-s002.pdf]

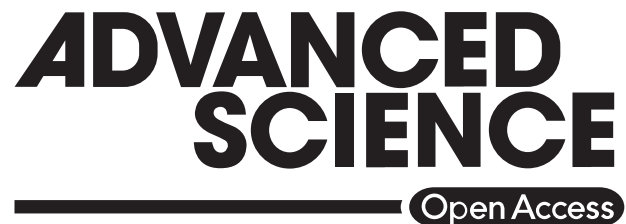

## Supporting Information

for *Adv. Sci.*, DOI 10.1002/adv.202105974

Metal-Free Perovskite Piezoelectric Nanogenerators for Human–Machine Interfaces and Self-Powered Electrical Stimulation Applications

*Han-Song Wu, Shih-Min Wei, Shuo-Wen Chen, Han-Chi Pan, Wei-Pang Pan, Shih-Min Huang, Meng-Lin Tsai\* and Po-Kang Yang\**

## Supporting Information

**Metal-Free Perovskite Piezoelectric Nanogenerators for Human-Machine Interfaces and Self-Powered Electrical Stimulation Applications**

*Han-Song Wu, Shih-Min Wei, Shuo-Wen Chen, Han-Chi Pan, Wei-Pang Pan, Shih-Min Huang, Meng-Lin Tsai\*, and Po-Kang Yang\**

**Table S1.** FWHMs of the XRD (200) peaks for MDABCO-NH<sub>4</sub>I<sub>3</sub> films prepared by various preheating temperatures.

| Preheating Temperature (°C) | FWHM (degree) |
|-----------------------------|---------------|
| RT                          | 0.160         |
| 100                         | 0.127         |
| 120                         | 0.127         |
| 140                         | 0.114         |

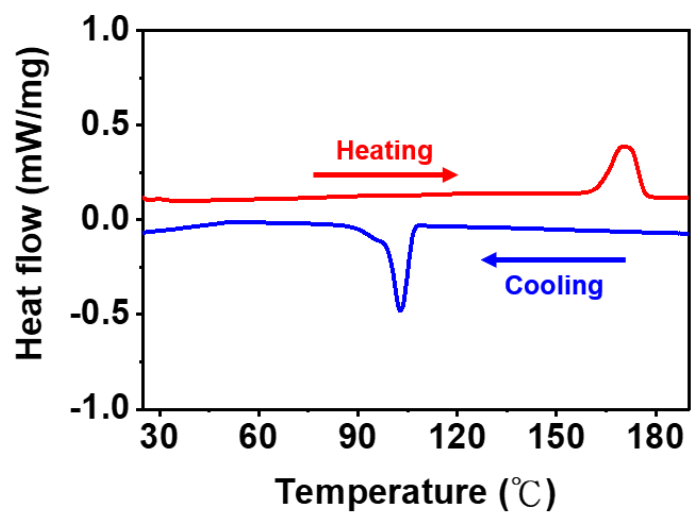

**Figure S1.** DSC characteristic of MDABCO-NH<sub>4</sub>I<sub>3</sub> thin film.

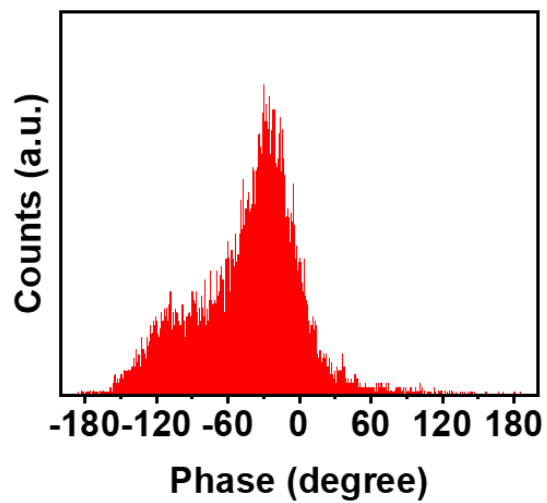

**Figure S2.** Phase distribution in phase image

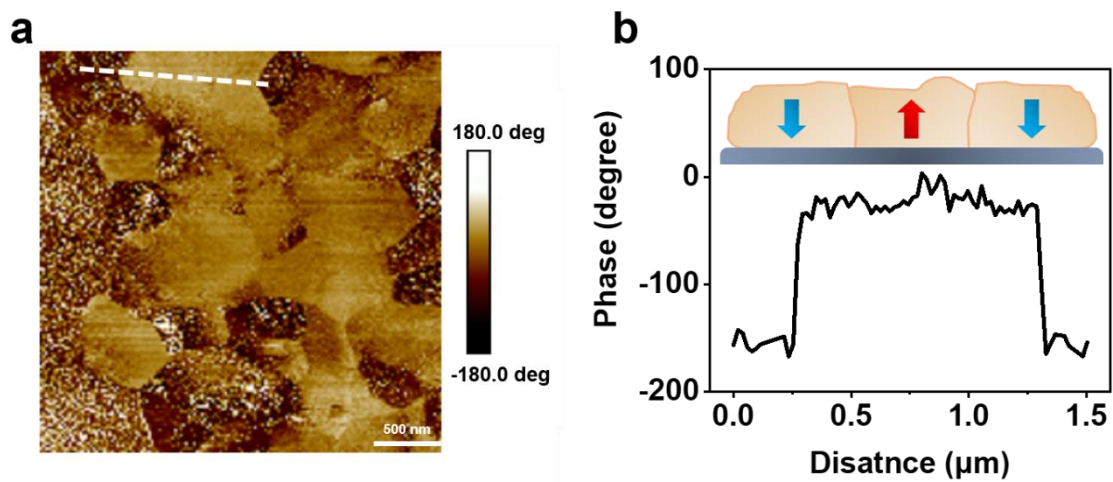

**Figure S3.** a) The chosen position in phase image (dash line) and b) Corresponding phase profile.

**Table S2.** The piezoelectric coefficient ( $d_{33}$ ) measured from various points and the average value.

| Point   | $d_{33}$ (pm/V) |
|---------|-----------------|
| 1       | 12.848          |
| 2       | 12.744          |
| 3       | 12.741          |
| 4       | 12.769          |
| 5       | 12.928          |
| Average | 12.806          |

The calculation method of the piezoelectric coefficient ( $d_{33}$ ) is based on the following equation.<sup>[S1]</sup>

$$d_{33} = \frac{\text{Amplitude (mV)} \times \text{deflection sensitivity (nm/V)}}{\text{Gain} \times \text{AC bias (mV)}} \quad (1)$$

The  $d_{33}$  coefficient was performed by using the static-sensitivity-based quantification method based on evaluating the reciprocal slope of the force-distance curve and making it as quantification factor of the amplitude from the PFM measurement.<sup>[S2,S3]</sup> The observed sensitivity was  $118.72 \text{ nmV}^{-1}$ . The sensitivity depends on the cantilever system and the tip selected.

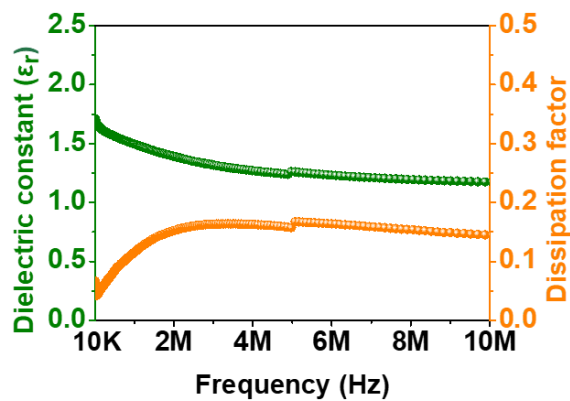

**Figure S4.** Frequency dependent relative dielectric constant and dissipation factor. The dielectric constant plays an important role in piezoelectric coefficient through the following formula:  $d_{33} = 2Q_{33} \times \epsilon_{33} \times P_r$ . ( $d_{33}$ : piezoelectric coefficient,  $Q_{33}$ : electrostriction constant,  $\epsilon_{33}$ : relative dielectric constant,  $P_r$ : remanent polarization).<sup>[S4]</sup>

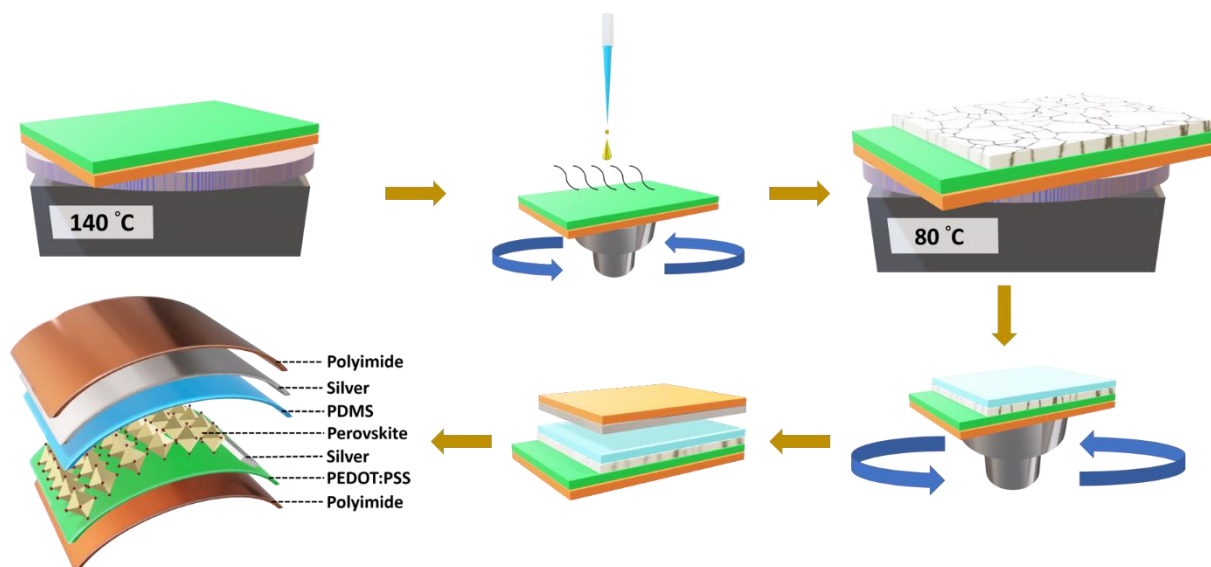

**Figure S5.** Schematic illustration of the MN-PENG fabrication procedures.



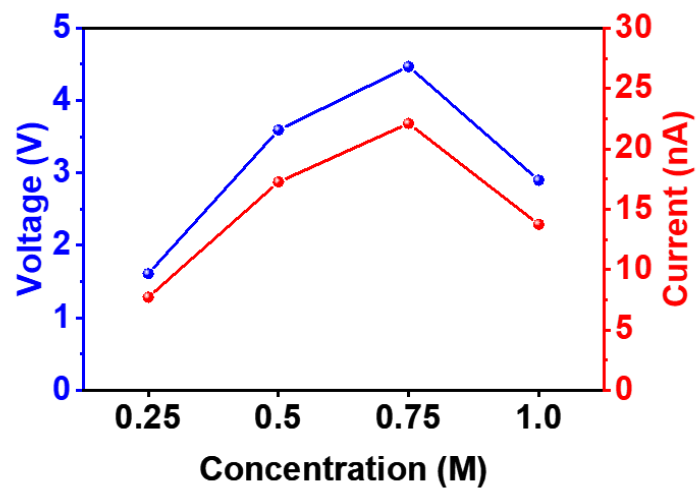

**Figure S6.** Output characteristics of the MN-PENG devices fabricated with various precursor concentrations (without preheating).

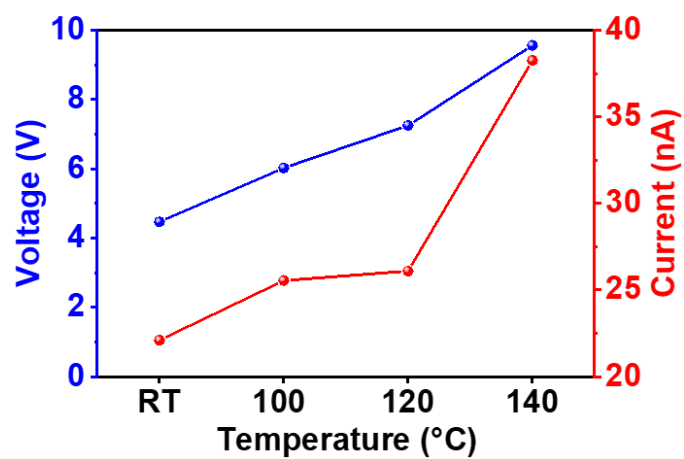

**Figure S7.** Output characteristics of the MN-PENG devices fabricated with various preheating temperatures (under fixed precursor concentration of 0.75 M).

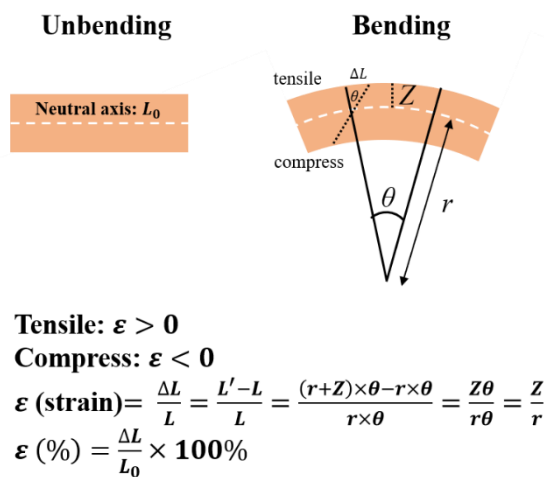

**Figure S8.** Illustration of the strain calculation process.

**Table S3.** Relation between displacement and strain.

| Displacement (mm) | Strain (%) |
|-------------------|------------|
| 10                | 0.29       |
| 12.5              | 0.35       |
| 15                | 0.41       |
| 17.5              | 0.50       |
| 20                | 0.55       |

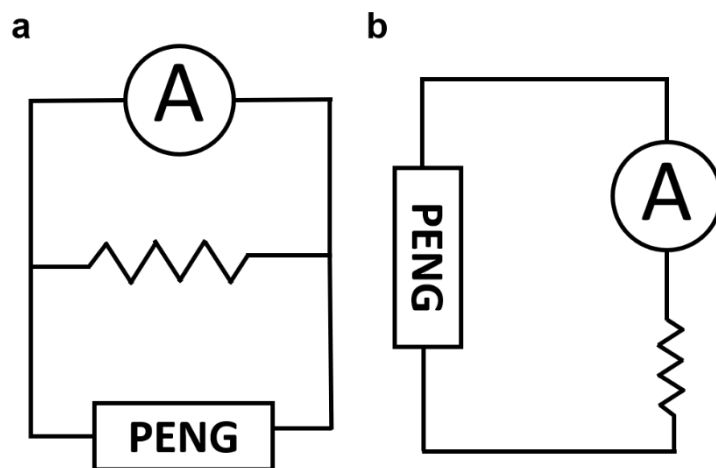

**Figure S9.** Schematic circuit diagrams for measuring a) output voltage and b) output current under external loads.

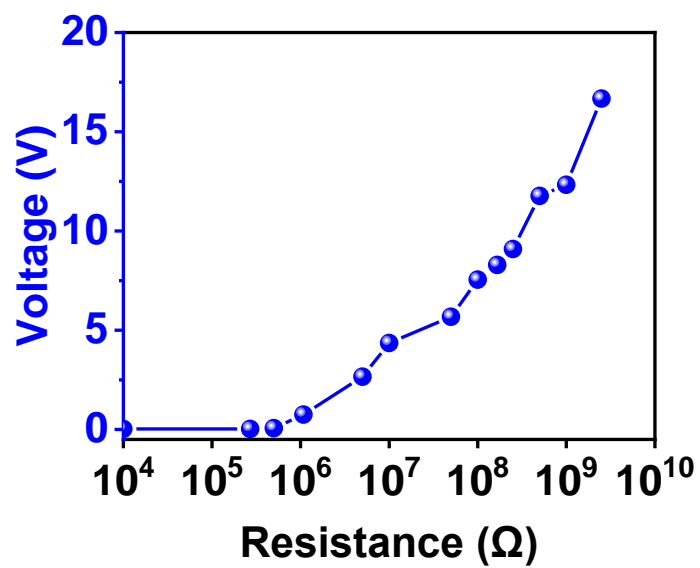

**Figure S10.** External resistance dependent output voltage of the MN-PENG.

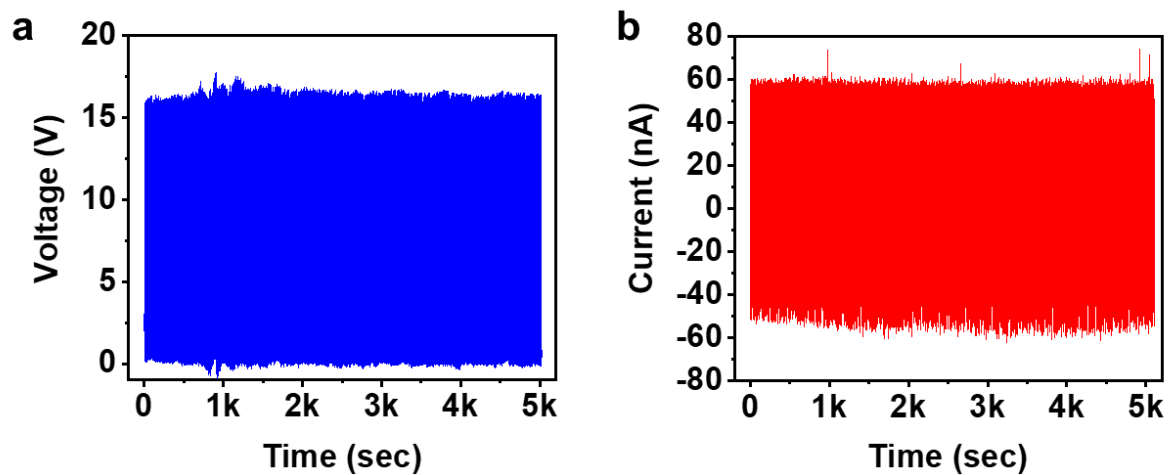

**Figure S11.** Stability test of the MN-PENG device. a) Output voltage under operation for 5000 s. b) Output current under operation for 5000 s.

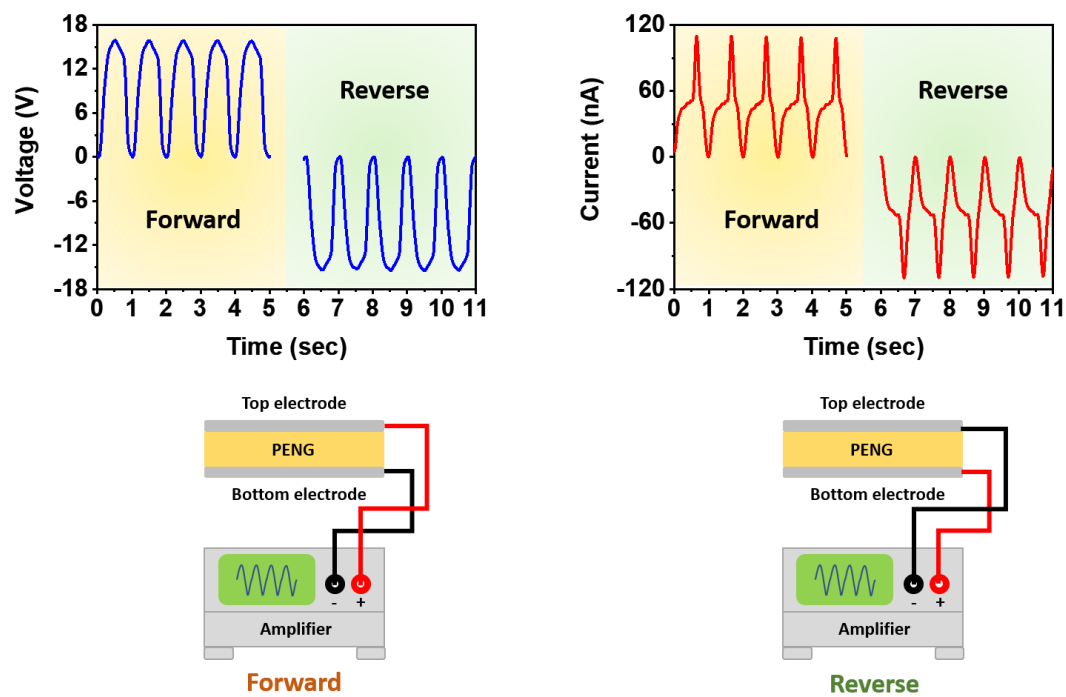

**Figure S12.** Output characteristics of the MN-PENG with forward and reverse wiring circuits.



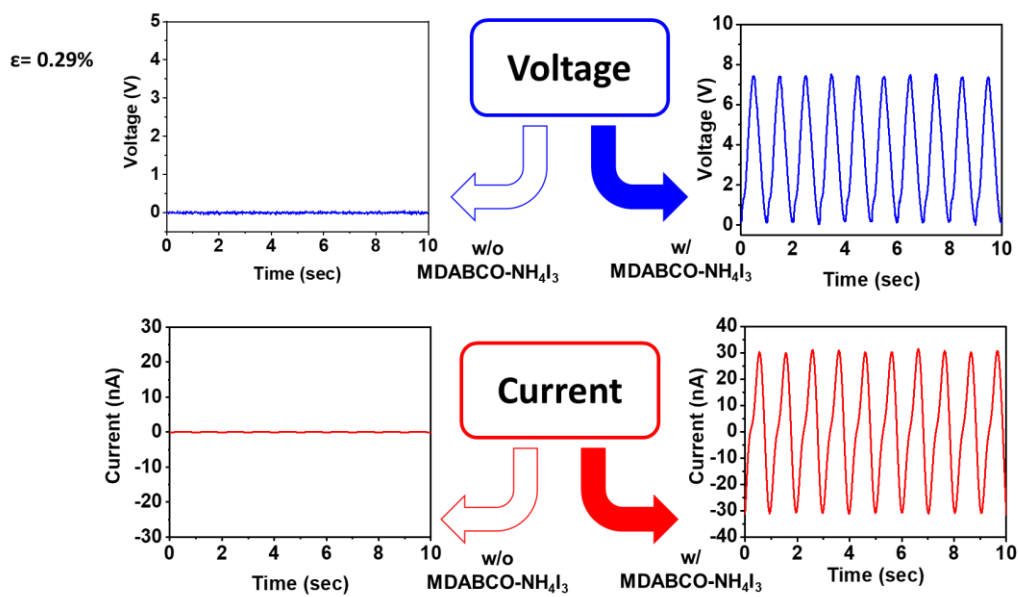

**Figure S13.** Output performance comparison between the devices with MDABCO-NH<sub>4</sub>I<sub>3</sub> and without MDABCO-NH<sub>4</sub>I<sub>3</sub>.

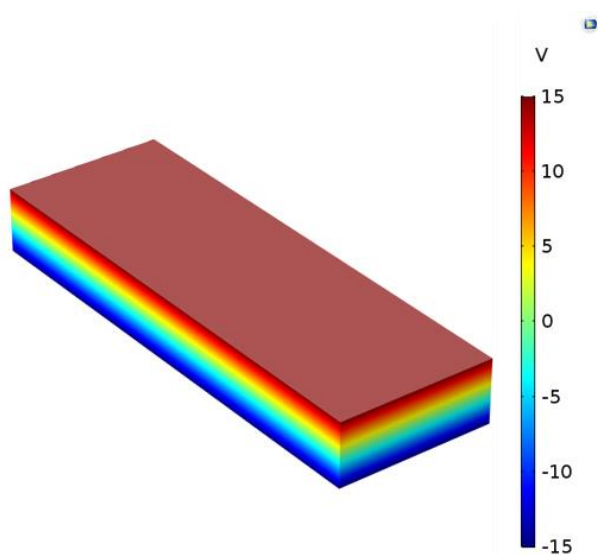

**Figure S14.** Piezoelectric potential distribution of the MN-PENG.

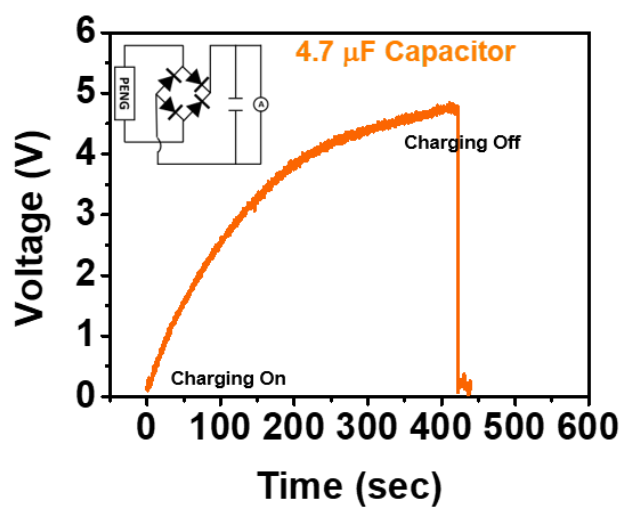

**Figure S15.** Charging profile of a 4.7  $\mu\text{F}$  capacitor charged by the MN-PENG operated under 1 Hz and  $\varepsilon = 0.55\%$ .

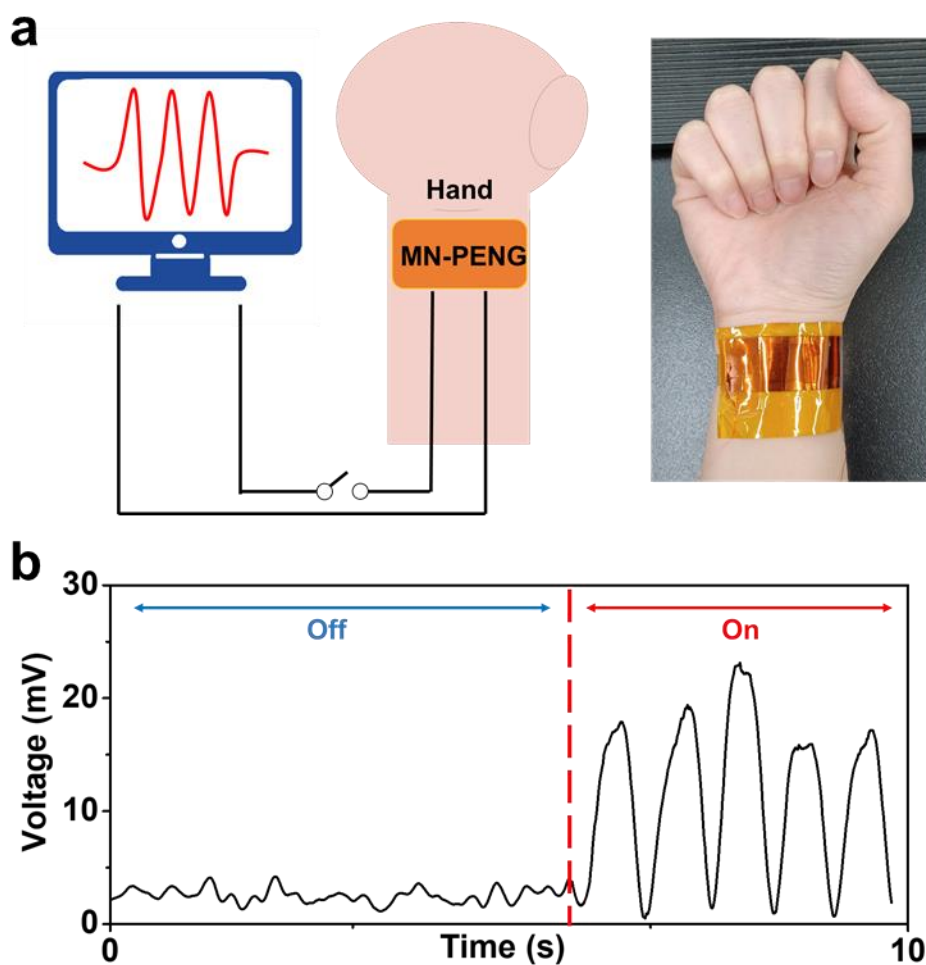

**Figure S16.** MN-PENG as an *in vitro* pulse sensor device. a) Schematic illustration and photographic image of the *in vitro* pulse sensor device. b) Voltage signals from the human pulse, the exhibited frequency was 1.4 Hz (~84 bpm, bpm: beats per minute), which was similar to the previous literatures.<sup>[S5-S7]</sup>

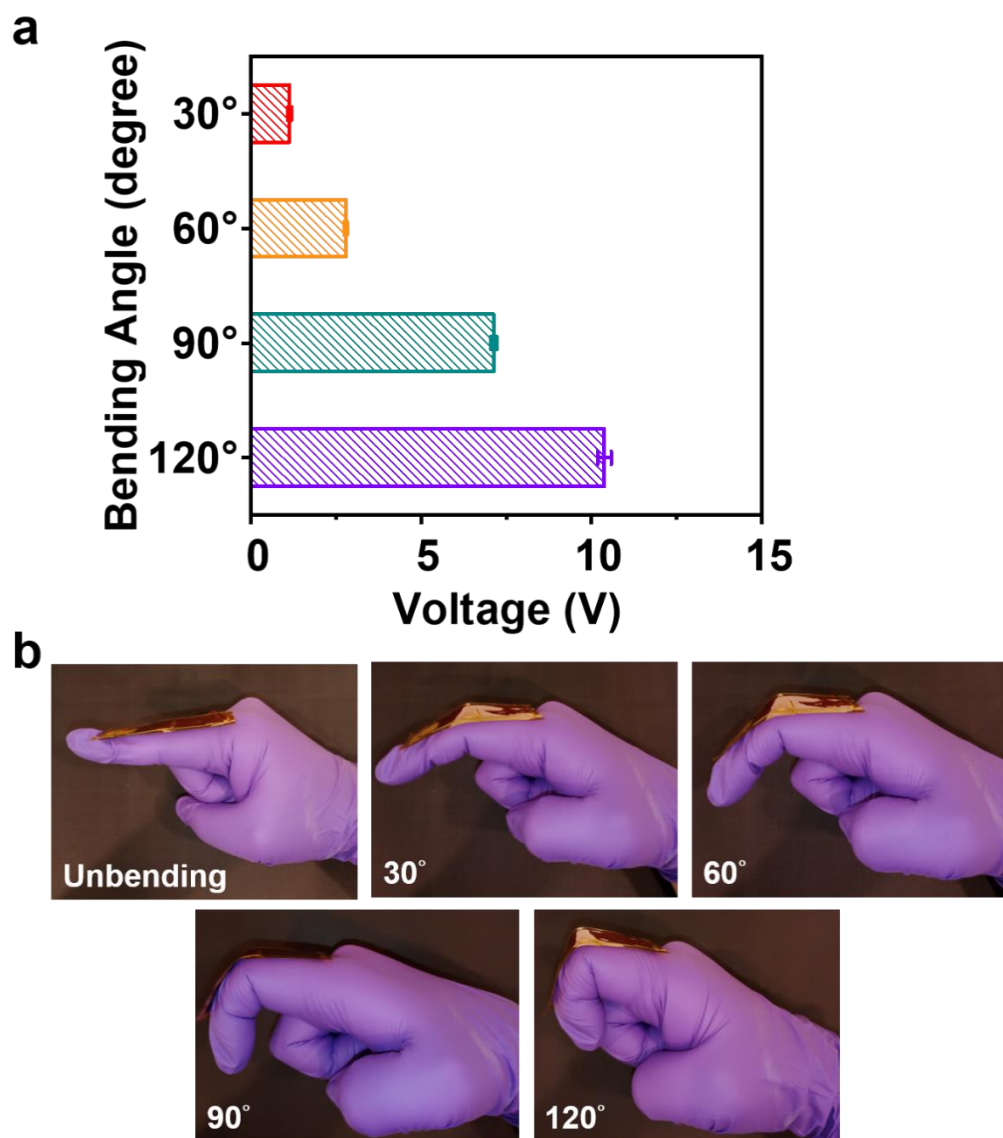

**Figure S17.** a) Output voltages of the MN-PENG on the forefinger with various bending angles. b) Images of various bending angles operated by the forefinger.

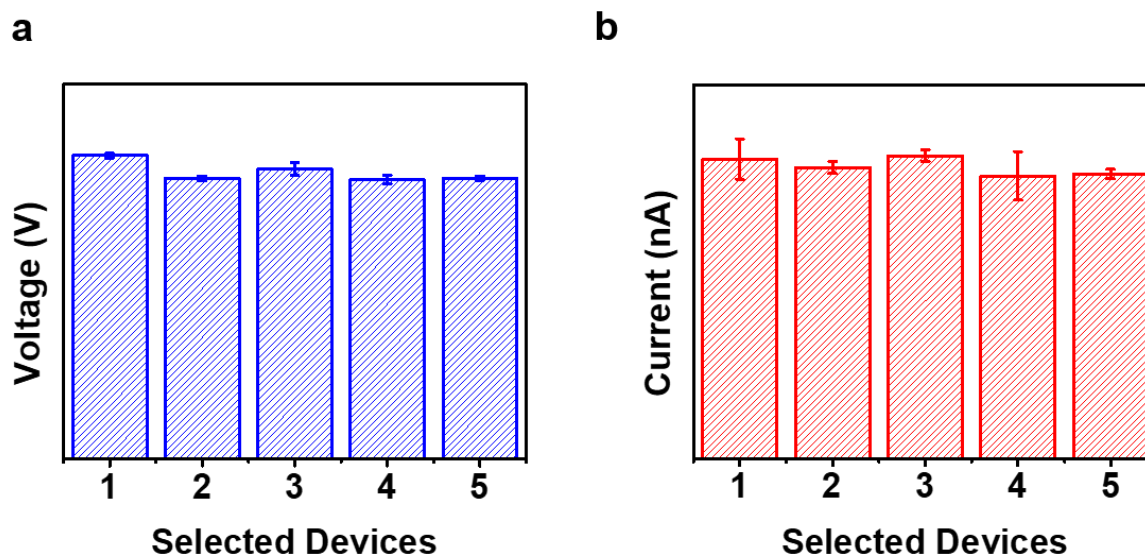

**Figure S18.** a) Output voltage and b) Output current of 5 MN-PENGs before integrating into the smart gesture system.

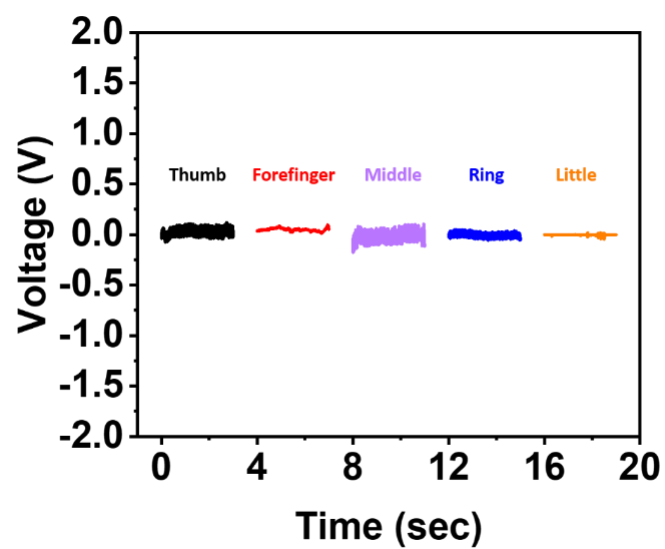

**Figure S19.** Output voltage of MN-PENG on each finger at the unbending state.

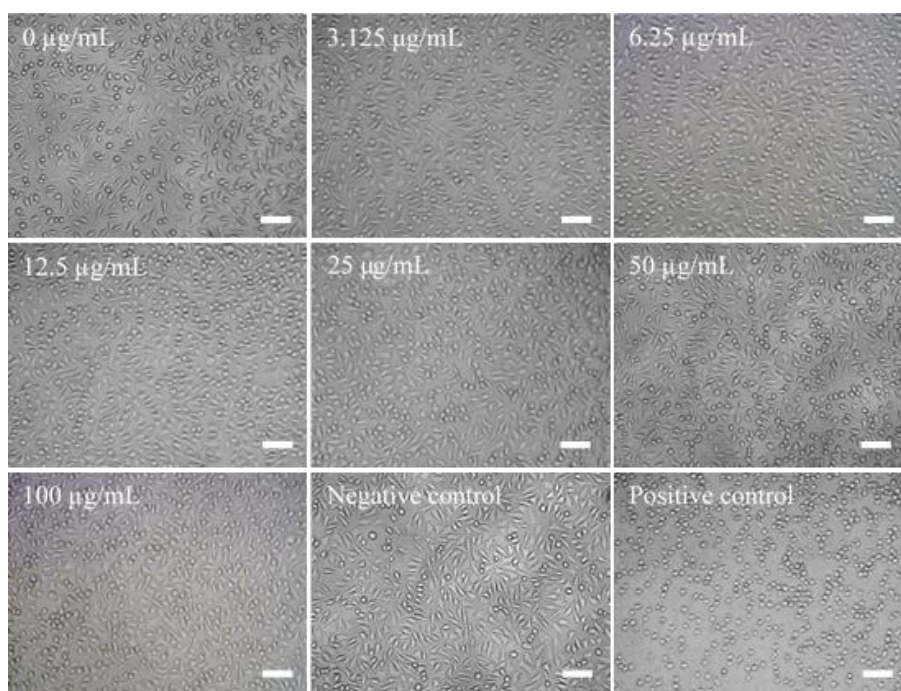

**Figure S20.** Image of cells cultured in a 96-well plate with various concentrations of MDABCO-NH<sub>4</sub>I<sub>3</sub>. The media containing 10% DMSO and 100 µL/mL of sterilized water serve as positive control and negative control, respectively. The scale bar is 100 µm.



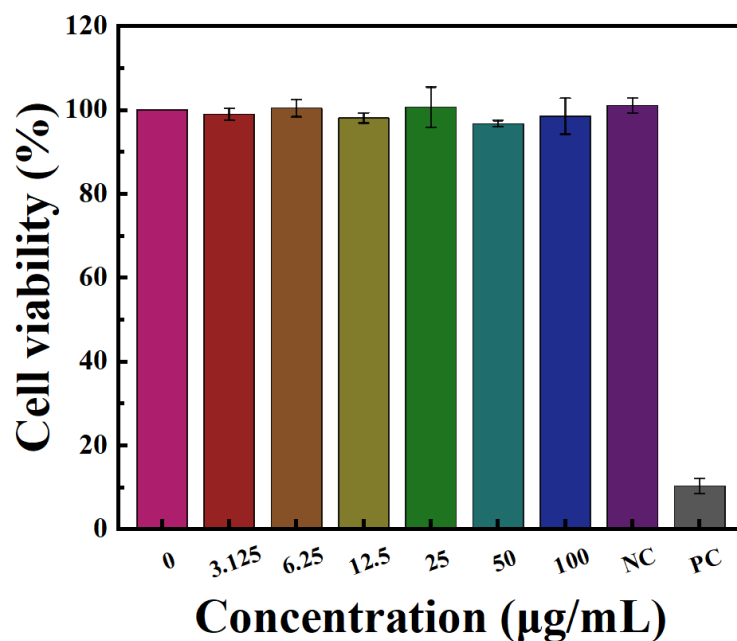

**Figure S21.** Cell viability with various concentrations of MDABCO-NH<sub>4</sub>I<sub>3</sub> (n = 9). The media containing 10% DMSO and 100 µL/mL of sterilized water serve as positive control (PC) and negative control (NC), respectively.

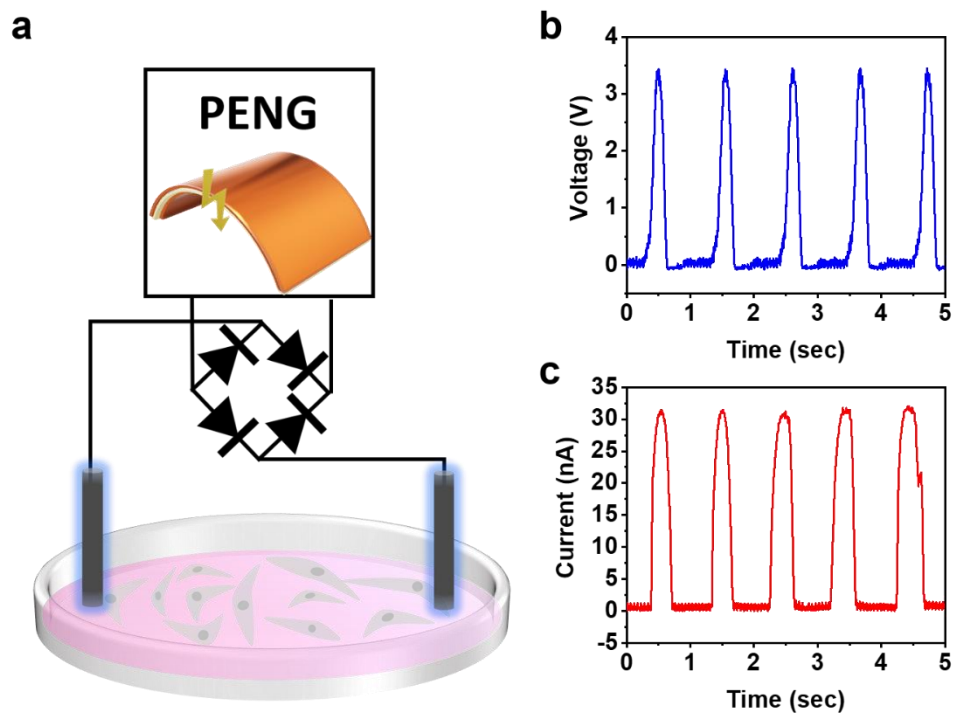

**Figure S22.** a) Schematic illustration of the *in vitro* electrical stimulation system. The MN-PENG was activated by a homemade mechanical system. b) Output voltage after rectification. c) Output current after rectification.

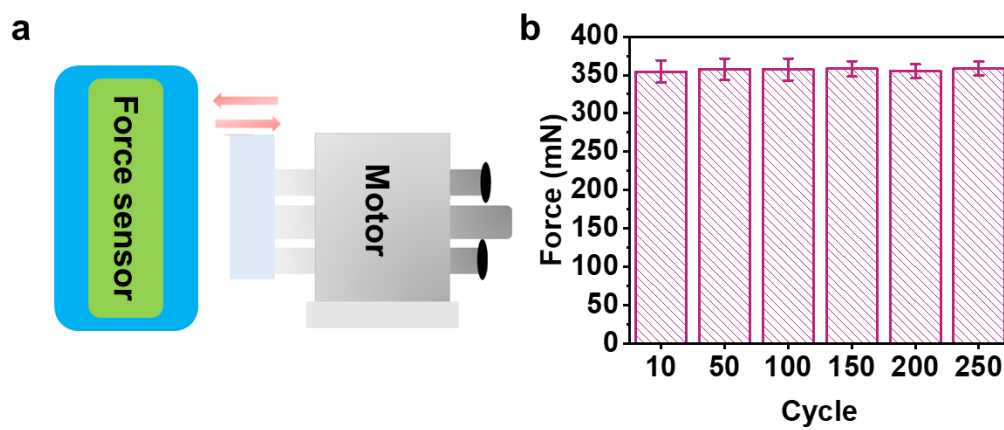

**Figure S23.** Illustration and distribution of applied force for generating electricity. a) Illustration of force measurement. b) Statistical diagram of force in 250 cycles.

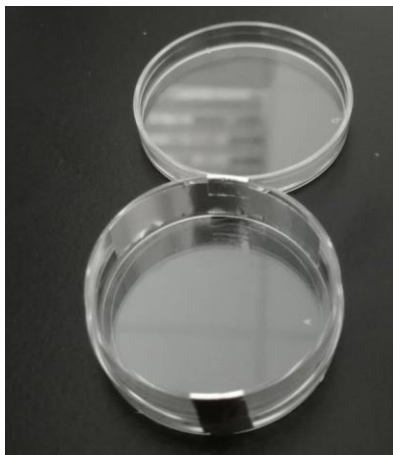

**Figure S24.** A 35 mm-diameter cell culture dish with symmetric aluminum electrodes capping on the margin.

## References

- [S1] P. K. Yang, S. A. Chou, C. H. Hsu, R. J. Mathew, K. H. Chiang, J. Y. Yang, Y. T. Chen, *Nano Energy* **2020**, *75*, 104879.
- [S2] O. Kwon, D. Seol, H. Qiao, Y. Kim, *Adv. Sci.* **2020**, *7*, 1901391.
- [S3] R. Proksch, *J. Appl. Phys.* **2015**, *118*, 072011.
- [S4] G. Helke, K. Lubitz, in *Springer Ser. Mater. Sci.*, Vol. 114 (Eds: W. Heywang, K. Lubitz, W. Wersing), Springer, Berlin, Heidelberg, Germany **2008**, Ch. 4.
- [S5] R. Avram, G. H. Tison, K. Aschbacher, P. Kuhar, E. Vittinghoff, M. Butzner, R. Runge, N. Wu, M. J. Pletcher, G. M. Marcus, J. Olgin, *npj Digital Med.* **2019**, *2*, 58.
- [S6] P. Li, Z. Zhang, W. Shen, C. Hu, W. Shen, D. Zhang, *J. Mater. Chem. A* **2021**, *9*, 4716.
- [S7] S. Cheng, S. Han, Z. Cao, C. Xu, X. Fang, X. Wang, *Small* **2020**, *16*, 1907461.
